# Supplementary material for: A greener process for flow C–H chlorination of cyclic alkanes using in situ generation and on-site consumption of chlorine gas
Source: Royal Society of Chemistry journal article supplement (doi:10.1039/c6re00159a), 2016-01-01
Supplement: c6re00159a1.pdf [file c6re00159a1.pdf]

## Electronic Supplementary Information

### **A greener process for flow C-H chlorination of cyclic alkanes using in-situ generation and on-site consumption of chlorine gas**

Takahide Fukuyama,<sup>\*a</sup> Masashi Tokizane,<sup>a</sup> Akihiro Matsui,<sup>a</sup> and Ilhyong Ryu<sup>\*a</sup>

<sup>a</sup>Department of Chemistry, Graduate School of Science, Osaka Prefecture University,  
Sakai, Osaka 599-8531, Japan

E-mail: ryu@c.s.osakafu-u.ac.jp

#### **Table of Contents**

|                                                                                      |           |
|--------------------------------------------------------------------------------------|-----------|
| <b>General Information</b>                                                           | <b>S2</b> |
| <b>Schematic Drawing for Photochlorination Setup</b>                                 | <b>S2</b> |
| <b>Typical Procedure for Photo Chlorination by in-situ Generated Cl<sub>2</sub>.</b> | <b>S3</b> |

## 1. General information

Microflow chlorination was carried out by using a Mikroglas Dwell Device, (1000  $\mu\text{m}$  width, 500  $\mu\text{m}$  depth, and 1.9 m length, and total hold-up volume: 0.95 mL, Foturan<sup>®</sup> glass, Mikroglas Chemtech GmbH, Germany). Photo-irradiation was carried out by using a 15 W black light (Toshiba Lighting & Technology Co.). Two T-shaped micromixers, GL Science P-727 (PEEK, i.d. = 500  $\mu\text{m}$ ), were used for flow chlorination. GC analysis was performed with a SHIMADZU GC-2014 gas chromatography equipped with flame ionization detector using a fused capillary column; column (J&W DB-1 (ID: 0.32 mm, length: 30 m, Film: 1  $\mu\text{m}$ ), N<sub>2</sub> (700 kPa); temperature program: 60 °C for 6 min, then 60 °C to 250 °C at 20 °C/min. GC yields were determined by comparing the peak area with that of the standard solution containing an authentic sample. GC-MS analyses were performed with a shimadzu GCMS-QP2010 mass spectrometer. All products are known and commercially available; GC-MS spectrums of the products are in agreement with that of the authentic samples.

## 2. Microflow System for Flow Chlorination.

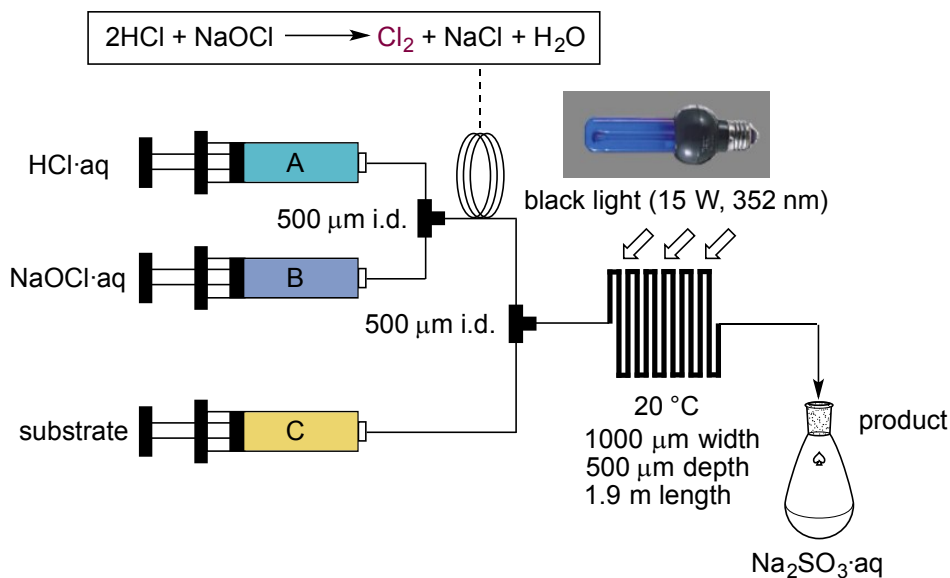

The microflow system for photo chlorination was comprised of two T-shaped micromixers (i.d. = 500  $\mu\text{m}$ , PEEK), the Mikroglas photo-microreactor, and PTFE tubes.

Substrate, HCl·aq, and NaOCl·aq were introduced by means of syringe pumps. The photo-microreactor has two separate channels. One channel through which water flows is a heat exchanger, allowing to examine the photoirradiation reaction at a controlled temperature (20 °C). The PTFE tube between two mixers has 1 mm i.d. and 1 m length. The photo-microreactor was irradiated using a 15 W black light, 1 cm from the reactor. The reaction mixture eluted from the outlet was collected in a flask containing 10% Na<sub>2</sub>SO<sub>3</sub>.

### **3. Typical Procedure for Photo Chlorination by in-situ Generated Cl<sub>2</sub>.**

2 M HCl (2 mL, 4 mmol) and 1.9 M NaOCl (1 mL, 1.9 mmol) were placed in 5 mL gas-tight syringes and introduced by the syringe pumps to the first micromixer with 16.2 mL/h and 8.6 mL/h flow rates respectively. The mixture was then passed through the PTFE tube (1 mm i.d. x 1 m), which is connected to the second micromixer. Cyclohexane (**1a**, 3.5 mL, 32.4 mmol) was placed in a 10 mL gas-tight and introduced to the second micromixer with 32.3 mL/h flow rate. The resulting mixture was then passed through Mikroglas Dwel Device, which was cooled with water, under photo irradiation using a 15 W black light. The reaction mixture eluted from the outlet was collected in a flask containing 10% Na<sub>2</sub>SO<sub>3</sub>. The organic layer was easily separated from aqueous layer, and yield of chlorocyclohexane (**2a**) was determined by GC analysis (94% yield) by comparing the peak area with that of the standard solution containing an authentic chlorocyclohexane (**2a**).
